# Supplementary material
Source: PubMed Central journal article supplement (PMC9433052)
Supplement: mmc1.pdf [file mmc1.pdf]

# THE LANCET

## Public Health

### **Supplementary appendix**

This appendix formed part of the original submission and has been peer reviewed. We post it as supplied by the authors.

Supplement to: Cohn E, Chimowitz M, Long T, Varma JK, Chokshi DA. The effect of a proof-of-vaccination requirement, incentive payments, and employer-based mandates on COVID-19 vaccination rates in New York City: a synthetic-control analysis. *Lancet Public Health* 2022; **7**: e754–62.

1 **Supplementary Material for “The effect of a proof-of-vaccination requirement, incentive**  
2 **payments, and employer-based mandates on COVID-19 vaccination rates in New York**  
3 **City: a synthetic-control analysis”**

4 **Table of Contents**

|    |                                                                                   |    |
|----|-----------------------------------------------------------------------------------|----|
| 5  | 1. NYC COVID-19 Vaccination Campaign Timeline                                     | 2  |
| 6  | 2. Data Processing                                                                | 3  |
| 7  | 3. Synthetic Control Group Donor Pool                                             | 4  |
| 8  | 4. Weights of Attributes Used to Select the Synthetic Control Group               | 7  |
| 9  | 5. COVID-19 Transmission in NYC and the Synthetic Control Group                   | 8  |
| 10 | 6. Placebo Studies                                                                | 9  |
| 11 | 7. Adjustment for the Pre-Intervention Difference in Vaccinations                 | 11 |
| 12 | 8. Robustness to the Beginning of the Pre-Intervention Period                     | 12 |
| 13 | 9. Placebo-in-time and Leave-one-out Robustness Checks                            | 13 |
| 14 | 10. Robustness to Exclusion of Counties with Vaccination Incentive Lotteries      | 15 |
| 15 | 11. Robustness to Exclusion of Counties with Reimbursement for Vaccine Counseling | 18 |
| 16 | 12. Impact on Receipt of First Doses for Residents 65 or Older                    | 21 |
| 17 | 13. Impact on Completion of Vaccination Series for Residents 18 or Older          | 23 |
| 18 | References                                                                        | 26 |
| 19 |                                                                                   |    |

20 **1. NYC COVID-19 Vaccination Campaign Timeline**

21 **Figure A1.1: NYC COVID-19 Vaccination Campaign Timeline.** Data are from CDC.<sup>1</sup> Policies are indicated by  
 22 capital letters by announcement date and are summarized in the table below.

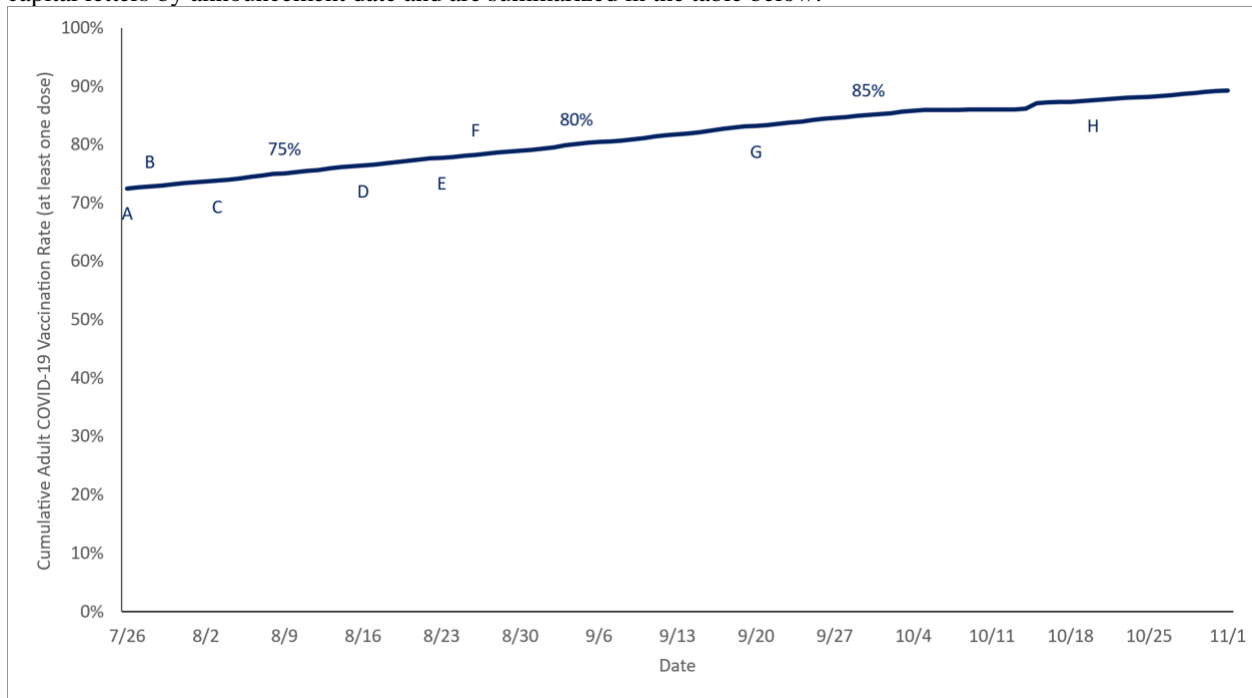

23

| Flag in Chart | Announced  | Effective Policy                 | Population affected               | Opt-out | Dose        |
|---------------|------------|----------------------------------|-----------------------------------|---------|-------------|
| A             | 7/26/2021  | 8/16/2021 Mandate                | Certain NYC government employees* | Testing | Full Series |
| A             | 7/26/2021  | 9/13/2021 Mandate                | NYC government employees          | Testing | Full Series |
| B             | 7/28/2021  | 7/28/2021 \$100 incentive        | NYC residents                     | NA      | First Dose  |
| C             | 8/3/2021   | 8/17/2021 † Proof-of-vaccination | Visitors to covered locations ‡   | No      | First Dose  |
| D             | 8/16/2021  | 9/27/2021 Mandate                | Healthcare workers                | No      | First Dose  |
| E             | 8/23/2021  | 9/27/2021 Mandate                | Department of Education employees | No      | First Dose  |
| F             | 8/26/2021  | 8/26/2021 Outreach §             | Residents of 20 neighborhoods     | NA      | Full Series |
| G             | 9/20/2021  | 9/20/2021 Counseling §           | Medicaid and Medicare Advantage   | NA      | First Dose  |
| H             | 10/20/2021 | 10/20/2021 \$500 incentive       | NYC government employees          | NA      | First Dose  |
| H             | 10/20/2021 | 10/29/2021 Mandate               | NYC government employees          | No      | Full Series |

24 \*The mandate effective August 16, 2021 applied to NYC government employees and contractors in residential and congregate care settings.

25 †Enforcement of the proof-of-vaccination requirement did not begin until September 13, 2021.

26 ‡The proof-of-vaccination requirement applied to employees and patrons (12 years or older) of indoor portions of entertainment and recreational  
 27 settings; indoor food services; and indoor gyms and fitness settings.

28 §The vaccine equity partner engagement program (“outreach”) and vaccine outreach and counseling program (“counseling”) were not explicitly  
 29 analyzed as part of the intervention because both consisted of outreach and engagement, while the other policies consisted of incentives or  
 30 mandates targeted toward individuals. Results are robust to the exclusion of counties known to have implemented policies similar to the vaccine  
 31 outreach and counseling program (appendix 11). We did not test robustness to the exclusion of counties with programs similar to the vaccine  
 32 equity partner engagement program out of concern that we would be unable to successfully identify all counties in the donor pool with  
 33 comparable policies.

34 **2. Data Processing**

35 CDC vaccination data used in the analysis included discontinuities due to reporting adjustments and retroactive  
36 reporting. These discontinuities distort the true pace of vaccinations. We made two adjustments to CDC-reported  
37 vaccination data to address these discontinuities.

38 Cumulative vaccination series in the raw CDC data change discontinuously for some states on some dates due to  
39 reporting adjustments.<sup>2</sup> We re-scaled pre-adjustment vaccination totals for counties in these states by the ratio of  
40 cumulative vaccinations just before and after the adjustment to generate an internally consistent cumulative  
41 vaccination series. We calculated daily vaccinations from the adjusted series of cumulative vaccinations.

42 Some large spikes persisted after these adjustments, perhaps due to retroactive reporting or data updates at the  
43 county level. We further adjusted county-level seven-day averages of new vaccinations by discarding and  
44 interpolating any seven-day blocks where (1) the seven-day average of vaccinations on the first day of the block was  
45 more than twice the seven-day average on the preceding day, and (2) the seven-day average of vaccinations on the  
46 first day after the block was less than half the seven-day average on the last day of the block. This adjustment  
47 reduced the incidence of large errors in daily vaccination totals at the cost of introducing error into the cumulative  
48 sum of daily vaccination totals. We chose to limit errors in daily vaccination totals because large, short-term errors  
49 have an outsize impact on the RRMSPE test statistic. We re-ran the analysis omitting this cleaning step as a  
50 robustness check. We estimated a cumulative impact of 428,820 persons (95% CI [66,505, 766,564]) or 6.4pp (95%  
51 CI [1.0pp, 11.6pp]), which is generally consistent with the main analysis.

52

53 **3. Synthetic Control Group Donor Pool**

54 The synthetic control group donor pool used for the analysis was limited to counties in the core of large metropolitan  
 55 statistical areas that did not implement vaccination policies before November 1, 2021 similar to those implemented  
 56 in New York City (NYC) and that had adequate vaccination data. This appendix describes the selection of the  
 57 synthetic control group donor pool in greater detail.

58 We selected the synthetic control group from a pool of 119 counties in the core of metropolitan statistical areas  
 59 (MSAs) with at least 500,000 residents that: (1) contain the entire population of the largest principal city of the  
 60 MSA, (2) have their entire population contained in the largest principal city of the MSA, (3) contain at least 250,000  
 61 residents of any principal city in an MSA with at least 1,000,000 residents, or (4) contain at least 250,000 residents  
 62 of the largest principal city in an MSA with 500,000-1,000,000 residents. Counties in MSAs with at least 1,000,000  
 63 residents that meet conditions (1), (2), or (3) are categorized as “large central metro” counties in the 2013 National  
 64 Center for Health Statistics Urban-Rural Classification Scheme for Counties.<sup>3</sup>

65 We excluded from the donor pool any county that implemented at least one policy comparable to those implemented  
 66 in NYC before November 1, 2021, any county contained in a state that implemented such a policy, or any county  
 67 whose largest principal city implemented such a policy. We did not exclude counties that implemented weaker  
 68 versions of policies in NYC as doing so would have eliminated enough counties from the donor pool that it would  
 69 not have been possible to select a suitable control group. Employer-based mandates were considered disqualifying if  
 70 failure to comply with the mandate could result in loss of employment, the mandate could not be satisfied by regular  
 71 testing or prior infection, and the mandate applied to the full sector. Vaccination payments were considered  
 72 disqualifying if the payments were available to adults of all ages at more than a few sites over more than a few dates,  
 73 if the number of payments was not capped below 1% of the jurisdiction’s population, and if the payments were  
 74 provided directly to vaccinated persons. Proof-of-vaccination mandates were considered disqualifying if the  
 75 mandate could not be satisfied with a recent negative test. Vaccine lotteries were not considered disqualifying  
 76 because NYC did not implement a vaccine lottery (aside from a small number of sites associated with a statewide  
 77 program); nevertheless, we confirmed that the results of the main analysis were robust to the exclusion of counties  
 78 with vaccine lotteries (appendix 10). Counties were not eliminated from the donor pool based on messaging,  
 79 outreach, or vaccine delivery infrastructure alone—and these types of programs were not considered part of the  
 80 intervention—because New York City undertook analogous programs. 58 counties remained eligible after these  
 81 exclusions.

82 Finally, we omitted counties if: (1) county of residence was not available for at least 75% of fully vaccinated  
 83 recipients in the jurisdiction containing the county as of any date during the analysis period, or (2) there was a gap of  
 84 at least 14 days in the analysis period during which no CDC vaccination data was available for the county. The  
 85 remaining 44 counties were included in the donor pool. Table A3.1 summarizes the number of counties that  
 86 remained eligible for the donor pool after each step.

87 **Table A3.1: Selection of counties into the donor pool.**

|                                                                                        | N     |
|----------------------------------------------------------------------------------------|-------|
| Counties and county-equivalent administrative divisions (excluding U.S. territories)   | 3,143 |
| + county is in a metropolitan statistical area with at least 500,000 residents in 2019 | 623   |
| + county is included in 2019 ACS 1-year estimates (population 65,000+)                 | 413   |
| + county is in a core of its metropolitan statistical area                             | 119   |
| + county did not implement a vaccination policy similar to those implemented in NYC    | 58    |
| + county was not excluded due to data limitations                                      | 44    |

88 We did not find evidence that data missingness introduced bias into the sample (table A3.2). None of the differences  
 89 between the population eligible for the donor pool and the population included in the donor pool were statistically  
 90 significant ( $p < 0.05$ ) using a one-sample, two-tailed t-test.

91 **Table 3.2: Characteristics of counties considered for and included in the donor pool.** Educational attainment is  
 92 reported for adults 25 years and over. Democratic vote share is calculated as the share of all non-third-party votes

93 earned by the Democratic candidate in the 2020 presidential election. Vaccination outcomes are calculated for  
 94 adults.

|                                        | NYC        | Core Counties (N=119)  | Eligible for Donor Pool (N=58) | Donor Pool (N=44)     |
|----------------------------------------|------------|------------------------|--------------------------------|-----------------------|
| <b>Population (all ages)</b>           |            |                        |                                |                       |
| County                                 | 8,336,817  | 1,087,566 (1,212,128)* | 959,209 (887,963)              | 890,916 (750,637)     |
| Metropolitan Statistical Area          | 19,216,182 | 3,434,829 (4,881,082)  | 2,773,220 (3,798,265)          | 2,377,313 (3,954,769) |
| <b>Race/Ethnicity, %</b>               |            |                        |                                |                       |
| Hispanic                               | 29.1       | 19.8 (17.1)            | 19.3 (18.3)                    | 16.6 (13.1)           |
| Non-Hispanic Asian                     | 14.3       | 6.4 (7.2)              | 4.9 (6.0)                      | 3.7 (2.5)             |
| Non-Hispanic Black                     | 21.7       | 17.0 (14.1)            | 15.7 (12.0)                    | 15.4 (11.9)           |
| <b>Age group, %</b>                    |            |                        |                                |                       |
| 16-59                                  | 60.5       | 59.0 (3.7)             | 58.1 (4.4)                     | 57.3 (4.3)            |
| ≥60                                    | 21.1       | 21.4 (4.5)             | 21.9 (5.8)                     | 23.0 (6.0)            |
| <b>Sex, %</b>                          |            |                        |                                |                       |
| Male                                   | 47.7       | 48.9 (0.9)             | 48.9 (0.8)                     | 48.8 (0.7)            |
| <b>Educational attainment, %</b>       |            |                        |                                |                       |
| High school graduate or higher         | 83.2       | 88.8 (4.6)             | 89.3 (4.6)                     | 89.7 (2.9)            |
| Bachelor's degree or higher            | 39.2       | 36.9 (10.5)            | 35.4 (9.9)                     | 33.6 (6.2)            |
| <b>Economic attributes</b>             |            |                        |                                |                       |
| Median household income (\$)           | 69,407     | 67,360 (16,761)        | 64,864 (13,893)                | 62,148 (8,672)        |
| Poverty rate (%)                       | 16.0       | 13.3 (4.0)             | 12.8 (3.6)                     | 12.8 (2.7)            |
| Unemployment rate (%)                  | 5.2        | 4.8 (1.4)              | 4.4 (1.0)                      | 4.4 (1.0)             |
| <b>Metropolitan area population, %</b> |            |                        |                                |                       |
| ≥ 1 million                            | 100.0      | 57.1 (49.7)            | 51.7 (50.4)                    | 47.8 (50.5)           |
| 500,000-999,999                        | 0.0        | 42.9 (49.7)            | 48.3 (50.4)                    | 52.2 (50.5)           |
| <b>Partisanship, %</b>                 |            |                        |                                |                       |
| Democratic vote share in 2020          | 77.0       | 61.6 (13.3)            | 55.9 (11.6)                    | 53.6 (10.8)           |
| <b>Vaccination, %†</b>                 |            |                        |                                |                       |
| At least one dose as of July 25        | 72.5       | 65.1 (13.5)            | 62.0 (9.7)                     | 64.4 (6.9)            |
| Received first dose June 28-July 25    | 3.4        | 3.0 (1.4)              | 2.7 (1.0)                      | 2.8 (1.0)             |

95 \*Numbers in parentheses show the standard deviation of the population of county-level estimates and do not account for within-county sampling  
 96 error.

97 †Vaccination data as of July 25 are available for 110 of 119 core counties and 50 of 58 counties eligible for the donor pool. Texas and Hawaii did  
 98 not report vaccination data to CDC as of July 25, 2021.

99 Table A3.3 shows the 44 counties included in the donor pool.

100 **Table A3.3: Donor pool for the synthetic control group.** Metropolitan statistical areas are defined by the United  
 101 States Office of Management and Budget.<sup>4</sup> Population estimates come from the 2019 American Community Survey  
 102 1-year estimates.<sup>5</sup>

| County       | State    | Largest City   | Metropolitan Statistical Area            | Population (County) | Population (MSA) |
|--------------|----------|----------------|------------------------------------------|---------------------|------------------|
| Jefferson    | Alabama  | Birmingham     | Birmingham-Hoover, AL                    | 658,573             | 1,090,435        |
| Maricopa     | Arizona  | Phoenix        | Phoenix-Mesa-Chandler, AZ                | 4,485,414           | 4,948,203        |
| Pima         | Arizona  | Tucson         | Tucson, AZ                               | 1,047,279           | 1,047,279        |
| Pulaski      | Arkansas | Little Rock    | Little Rock-North Little Rock-Conway, AR | 391,911             | 744,483          |
| Brevard      | Florida  | Palm Bay       | Palm Bay-Melbourne-Titusville, FL        | 601,942             | 601,942          |
| Duval        | Florida  | Jacksonville   | Jacksonville, FL                         | 957,755             | 1,559,514        |
| Escambia     | Florida  | Pensacola      | Pensacola-Ferry Pass-Brent, FL           | 318,316             | 502,629          |
| Hillsborough | Florida  | Tampa          | Tampa-St. Petersburg-Clearwater, FL      | 1,471,968           | 3,194,831        |
| Lee          | Florida  | Cape Coral     | Cape Coral-Fort Myers, FL                | 770,577             | 770,577          |
| Miami-Dade   | Florida  | Miami          | Miami-Fort Lauderdale-Pompano Beach, FL  | 2,716,940           | 6,166,488        |
| Orange       | Florida  | Orlando        | Orlando-Kissimmee-Sanford, FL            | 1,393,452           | 2,608,147        |
| Pinellas     | Florida  | St. Petersburg | Tampa-St. Petersburg-Clearwater, FL      | 974,996             | 3,194,831        |

| <b>County</b> | <b>State</b>   | <b>Largest City</b> | <b>Metropolitan Statistical Area</b>           | <b>Population (County)</b> | <b>Population (MSA)</b> |
|---------------|----------------|---------------------|------------------------------------------------|----------------------------|-------------------------|
| Polk          | Florida        | Lakeland            | Lakeland-Winter Haven, FL                      | 724,777                    | 724,777                 |
| Sarasota      | Florida        | North Port          | North Port-Sarasota-Bradenton, FL              | 433,742                    | 836,995                 |
| Volusia       | Florida        | Deltona             | Deltona-Daytona Beach-Ormond Beach, FL         | 553,284                    | 668,365                 |
| Ada           | Idaho          | Boise               | Boise City, ID                                 | 481,587                    | 749,057                 |
| Marion        | Indiana        | Indianapolis        | Indianapolis-Carmel-Anderson, IN               | 964,582                    | 2,076,531               |
| Sedgwick      | Kansas         | Wichita             | Wichita, KS                                    | 516,042                    | 640,218                 |
| Fayette       | Kentucky       | Lexington           | Lexington-Fayette, KY                          | 323,152                    | 517,056                 |
| Jefferson     | Kentucky       | Louisville          | Louisville/Jefferson County, KY-IN             | 766,757                    | 1,266,389               |
| Hampden       | Massachusetts  | Springfield         | Springfield, MA                                | 466,372                    | 697,382                 |
| Suffolk       | Massachusetts  | Boston              | Boston-Cambridge-Newton, MA-NH                 | 803,907                    | 4,873,019               |
| Worcester     | Massachusetts  | Worcester           | Worcester, MA-CT                               | 830,622                    | 947,404                 |
| Wayne         | Michigan       | Detroit             | Detroit-Warren-Dearborn, MI                    | 1,749,343                  | 4,319,629               |
| Jackson       | Missouri       | Kansas City         | Kansas City, MO-KS                             | 703,011                    | 2,155,068               |
| Clark         | Nevada         | Las Vegas           | Las Vegas-Henderson-Paradise, NV               | 2,266,715                  | 2,266,715               |
| Hudson        | New Jersey     | Jersey City         | New York-Newark-Jersey City, NY-NJ-PA          | 672,391                    | 19,216,182              |
| Union         | New Jersey     | Elizabeth           | New York-Newark-Jersey City, NY-NJ-PA          | 556,341                    | 19,216,182              |
| Franklin      | Ohio           | Columbus            | Columbus, OH                                   | 1,316,756                  | 2,122,271               |
| Montgomery    | Ohio           | Dayton              | Dayton-Kettering, OH                           | 531,687                    | 807,611                 |
| Oklahoma      | Oklahoma       | Oklahoma            | Oklahoma City, OK                              | 797,434                    | 1,408,950               |
| Tulsa         | Oklahoma       | Tulsa               | Tulsa, OK                                      | 651,552                    | 998,655                 |
| Allegheny     | Pennsylvania   | Pittsburgh          | Pittsburgh, PA                                 | 1,216,045                  | 2,317,600               |
| Dauphin       | Pennsylvania   | Harrisburg          | Harrisburg-Carlisle, PA                        | 278,299                    | 577,941                 |
| Lackawanna    | Pennsylvania   | Scranton            | Scranton--Wilkes-Barre, PA                     | 209,674                    | 553,885                 |
| Lancaster     | Pennsylvania   | Lancaster           | Lancaster, PA                                  | 545,724                    | 545,724                 |
| Lehigh        | Pennsylvania   | Allentown           | Allentown-Bethlehem-Easton, PA-NJ              | 369,318                    | 844,052                 |
| Greenville    | South Carolina | Greenville          | Greenville-Anderson, SC                        | 523,542                    | 920,477                 |
| Davidson      | Tennessee      | Nashville           | Nashville-Davidson--Murfreesboro--Franklin, TN | 694,144                    | 1,933,860               |
| Knox          | Tennessee      | Knoxville           | Knoxville, TN                                  | 470,313                    | 869,525                 |
| Shelby        | Tennessee      | Memphis             | Memphis, TN-MS-AR                              | 937,166                    | 1,344,910               |
| Salt Lake     | Utah           | Salt Lake City      | Salt Lake City, UT                             | 1,160,437                  | 1,232,696               |
| Utah          | Utah           | Provo               | Provo-Orem, UT                                 | 636,235                    | 649,603                 |
| Weber         | Utah           | Ogden               | Ogden-Clearfield, UT                           | 260,213                    | 683,024                 |

104 **4. Weights of Attributes Used to Select the Synthetic Control Group**

105 We selected a synthetic control group for each outcome using a two-step process. First, weights were selected for  
 106 each attribute used in the matching process to capture the relative power of each attribute at predicting vaccination  
 107 outcomes. Second, the control group was chosen as the weighted average of counties that best matched NYC over  
 108 the matching period as measured by the weighted set of attributes. Table A4.1 shows the attribute weights used to  
 109 select the synthetic control group for the main analysis. Race and ethnicity, partisanship, recent vaccinations, age,  
 110 and median income were most predictive of vaccinations and thus received the most weight in the matching process.

111 **Table A4.1: Weights of attributes used in the matching process**

| <b>Attribute</b>                                  | <b>Weight</b> |
|---------------------------------------------------|---------------|
| <b>Race/Ethnicity, all categories (%)</b>         | <b>21%</b>    |
| Hispanic (%)                                      | 8%            |
| Non-Hispanic Asian (%)                            | 4%            |
| Non-Hispanic Black (%)                            | 9%            |
| Democratic vote share in 2020 (%)                 | 18%           |
| Received first dose in prior four weeks (%)       | 14%           |
| <b>Age, all categories (%)</b>                    | <b>13%</b>    |
| Age, 16-59 (%)                                    | 8%            |
| Age, ≥ 60 (%)                                     | 5%            |
| Median Income (\$)                                | 10%           |
| <b>Educational attainment, all categories (%)</b> | <b>8%</b>     |
| High school graduate or higher (%)                | 5%            |
| Bachelor’s degree or higher (%)                   | 3%            |
| At least one dose to date (%)                     | 9%            |
| Poverty rate (%)                                  | 4%            |
| Male (%)                                          | 1%            |
| Metropolitan area population (% ≥ 1 million)      | 1%            |
| Unemployment rate (%)                             | 1%            |

112



113 **5. COVID-19 Transmission in NYC and the Synthetic Control Group**

114 The synthetic control group used in the main analysis was constructed by matching on pre-intervention vaccination  
115 outcomes and several constant-in-time demographic and socioeconomic attributes associated with variation in  
116 vaccination rates. In addition to those factors used in the matching process, variation in vaccination rates may also  
117 reflect variation in perceived risk of COVID-19 transmission, which we proxied using case rates reported by CDC.<sup>6,7</sup>  
118 We did not use historical COVID-19 transmission data to construct the synthetic control group because the timing of  
119 historical transmission and widespread vaccine availability in the United States would not have allowed for the  
120 assignment of an appropriate attribute weight to COVID-19 transmission: vaccination rates were supply-constrained  
121 at the start of training period (breaking any link between transmission and vaccination), and case levels were low  
122 throughout the country later in the training period (leaving little meaningful variation in transmission to drive  
123 variation in vaccination rates). Instead, we first selected a synthetic control group using other attributes and then  
124 compared NYC's reported case rate against that of the synthetic control group to assess the likelihood that  
125 differences in COVID-19 transmission (or the perceived risk of transmission) could explain differences in  
126 vaccination. NYC's reported rate of COVID-19 transmission tracked the trend and approximate magnitude of  
127 COVID-19 transmission in the control group during the pre-intervention and intervention periods (figure A5.1). This  
128 provides suggestive evidence that the difference in vaccination outcomes during the intervention period was not  
129 primarily driven by a discontinuous shift in relative transmission rates between the pre-intervention and intervention  
130 periods.

131 **Figure A5.1: Daily new COVID-19 cases in NYC and the synthetic control group**

132 Data are from CDC Community Profile Reports and were interpolated for days on which no report was published.<sup>8</sup>  
133 The validation period starts at the Y-axis. The vertical dashed line indicates the start of the matching period. The  
134 vertical solid line indicates the start of the intervention period.

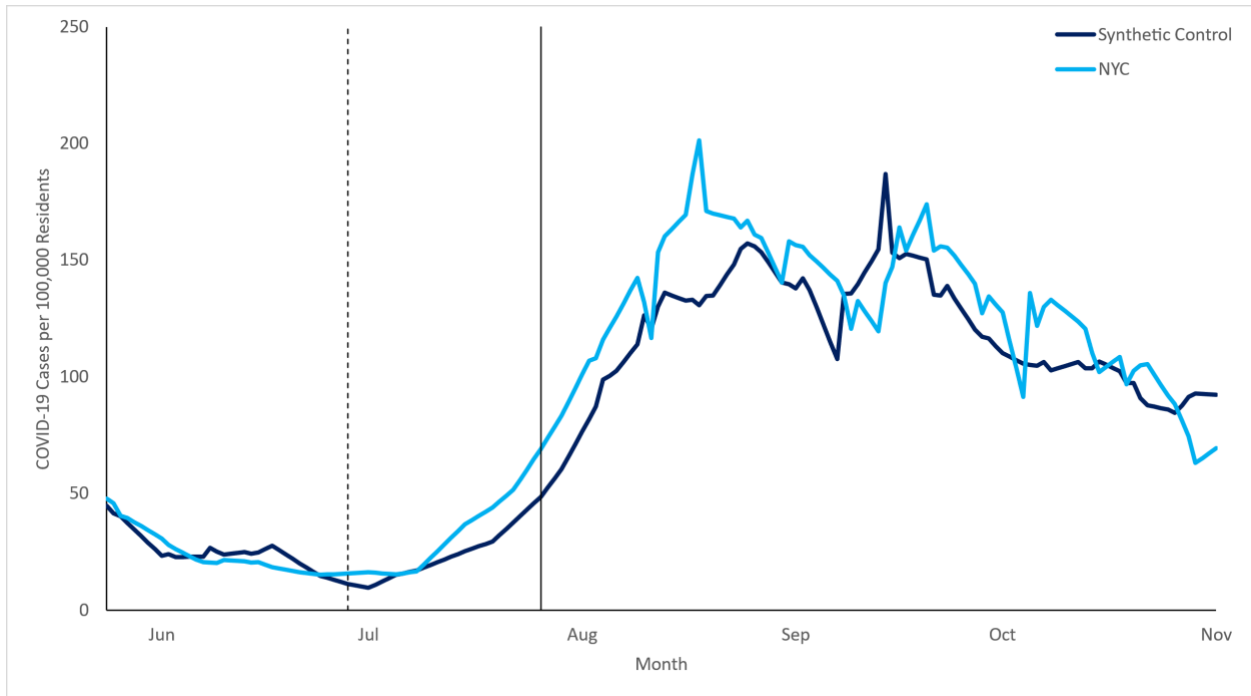

135

136 **6. Placebo Studies**

137 We assessed the significance of our impact estimate using placebo tests.<sup>9</sup> A separate control group was selected for  
138 each member of the donor pool. We would not expect to observe differences in vaccination outcomes between each  
139 donor pool county and its corresponding control group during the intervention period because no intervention  
140 occurred. We compared the intervention-period gap in vaccination outcomes for NYC against the distribution of  
141 gaps for placebo counties to determine whether NYC's gap was sufficiently large that it would have been unlikely to  
142 have occurred by chance. In fact, the City's intervention period gap in vaccination outcomes was large relative to the  
143 distribution of gaps among donor pool counties (figure A6.1). We might also expect to observe a comparatively  
144 large intervention period gap in vaccination outcomes for NYC even in the absence of an impact if NYC's control  
145 group fit poorly compared to the control groups selected for donor pool counties. In fact, pre-intervention gaps for  
146 most placebo counties were comparable in magnitude to NYC's (figure A6.1). This suggests that NYC's  
147 comparatively large intervention period gap in vaccination outcomes cannot be attributed to a poorly fitting control  
148 group.

149 **Figure A6.1: Daily gaps in adult COVID-19 vaccinations (first dose) between NYC and its synthetic control**  
150 **group and between each placebo county and the corresponding synthetic control group.** Data are from CDC.<sup>1</sup>  
151 The validation period starts at the Y-axis. The vertical dashed line indicates the start of the matching period. The  
152 vertical solid line indicates the start of the intervention period. The large, week-long gap in a placebo county in early  
153 September occurs in Jefferson County, Kentucky, and results from retroactive reporting.

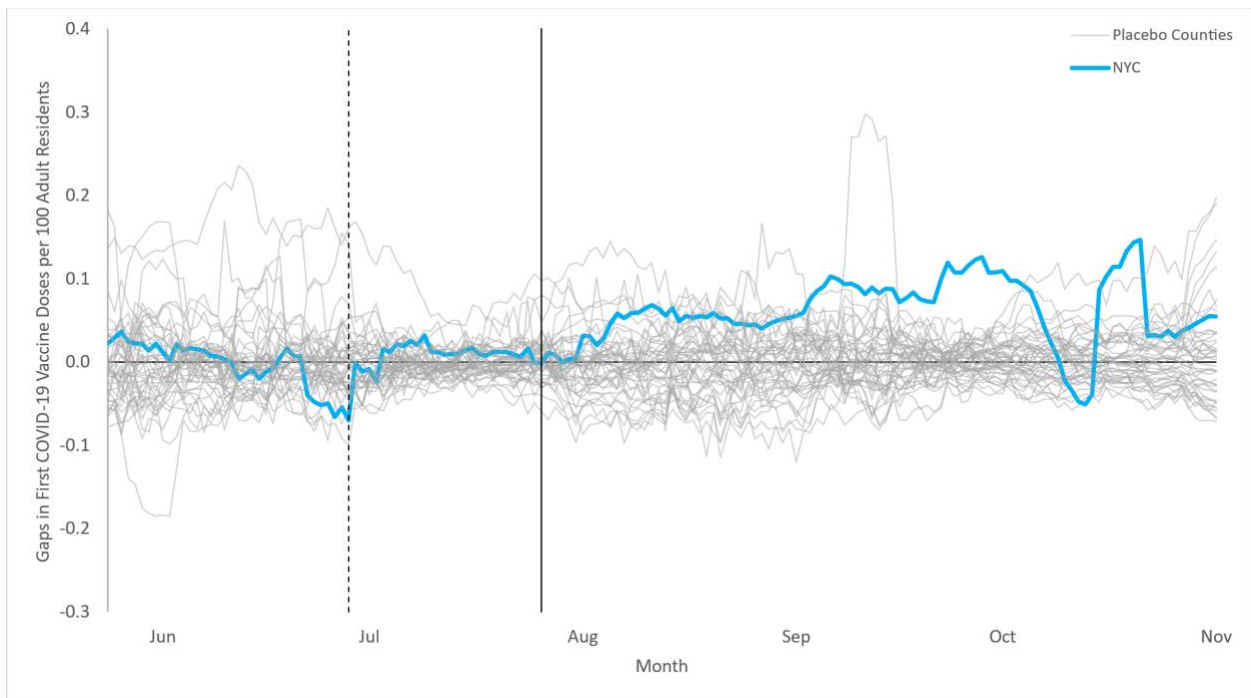

154  
155 To assess statistical significance more precisely, we normalized intervention period gaps in vaccination outcomes  
156 (which were summarized as the RMSPE during the intervention period) by the preintervention fit of each control  
157 group (which was measured by validation period RMSPE). If each county had the same probability of receiving the  
158 intervention, the impact on NYC could be interpreted as statistically significant if the intervention-period-to-pre-  
159 intervention-period ratio of RMSPEs was larger than the ratio of RMSPE calculated for at least 95% of units in the  
160 donor pool, including NYC. In fact, NYC's intervention-period-to-pre-intervention-period ratio of RMSPEs was  
161 larger than the ratio of all 44 donor pool counties (figure A6.2).

162 **Figure A6.2: Ratio of intervention-period to pre-intervention root mean squared prediction errors for NYC**  
163 **and each donor pool county.** Data are from CDC.<sup>1</sup>

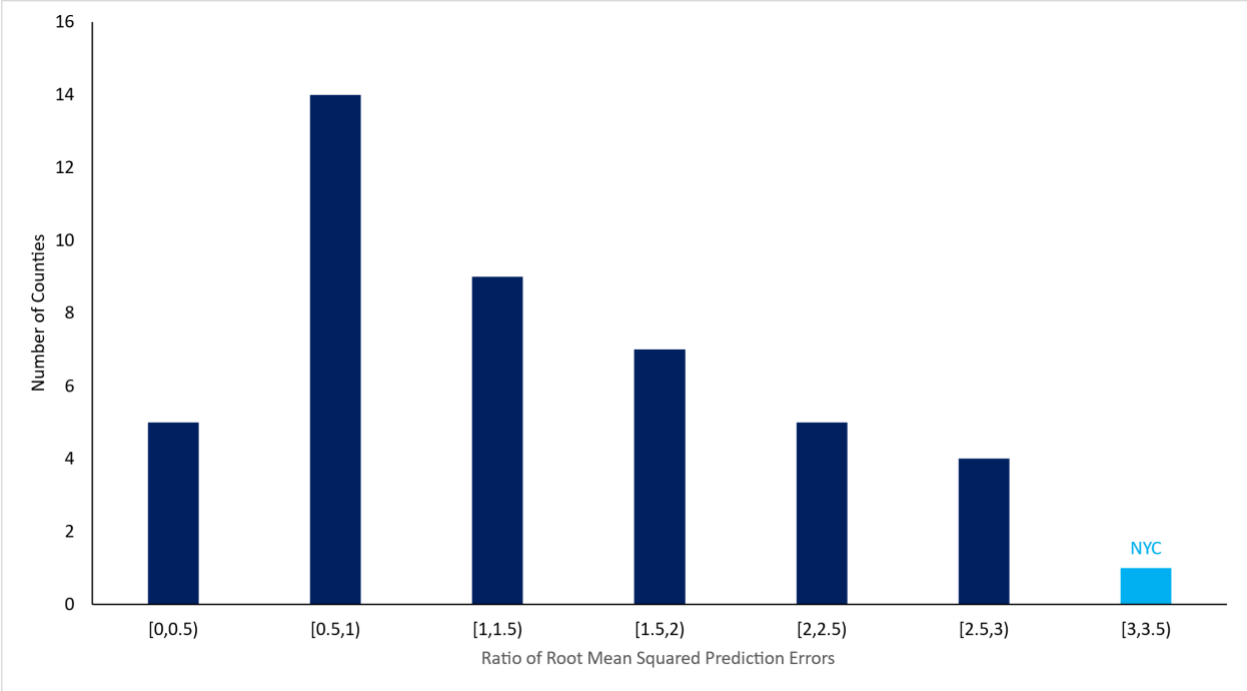

164

165 **7. Adjustment for the Pre-Intervention Difference in Vaccinations**

166 The impact estimate presented in the main analysis implicitly assumed no difference in pre-intervention vaccination  
167 outcomes between NYC and the synthetic control group. In fact, the validation-period sum of the seven-day average  
168 of the share of adult NYC residents receiving a first dose of an authorized COVID-19 vaccine on each day was 1.2%  
169 or 0.1pp higher than the comparable figure for the control group (11.1pp vs. 10.9pp). The estimated impact on  
170 vaccinations may be partially explained this pre-intervention difference in vaccination outcomes. We re-ran the  
171 analysis, adjusting control group vaccination outcomes upward by 1.2%, as a robustness check. The policies'  
172 estimated cumulative impact shrank slightly from 6.2pp (410,201 persons) to 6.1pp (401,741 persons) and remained  
173 statistically significant ( $p=0.022$ ).

174

175 **8. Robustness to the Beginning of the Pre-Intervention Period**

176 The main analysis excluded vaccination data from before April 26, 2021 out of concern that earlier vaccination data  
 177 might reflect supply or administration capacity constraints rather than demand. The choice to exclude data from  
 178 before April 26, 2021 followed from an analysis of county-level vaccination data. We used the peak seven-day  
 179 average of new vaccinations in each county as a proxy for the earliest possible date on which vaccine administration  
 180 could be considered demand-constrained. All but one county in the analysis sample (Hampden County,  
 181 Massachusetts) peaked on or before April 17, 2021. We discarded an additional eight days of data, from April 18,  
 182 2021 to April 25, 2021, to provide additional certainty that vaccine administration was demand-constrained. The  
 183 exact choice of April 26, 2021 was somewhat arbitrary. Table A8.1 shows impact estimates and confidence intervals  
 184 using alternate start points. The results are consistent with the main analysis.

185 **Table A8.1: Estimated impact of NYC’s policies on COVID-19 vaccinations (first dose) for alternate choices**  
 186 **for the start of the training period.** The main analysis appears in the second row.

| Training Period |           | Validation Period |           | Impact | 95% CI             |
|-----------------|-----------|-------------------|-----------|--------|--------------------|
| Start           | End       | Start             | End       |        |                    |
| 4/19/2021       | 5/16/2021 | 5/17/2021         | 7/25/2021 | +6.1pp | [+1.6pp, +10.4pp]  |
| 4/26/2021       | 5/23/2021 | 5/24/2021         | 7/25/2021 | +6.2pp | [+1.4pp, +10.7pp]  |
| 5/3/2021        | 5/30/2021 | 5/31/2021         | 7/25/2021 | +6.2pp | [+0.3pp, +11.9pp]  |
| 5/10/2021       | 6/6/2021  | 6/7/2021          | 7/25/2021 | +6.4pp | [-1.6pp, +14.1pp]  |
| 5/17/2021       | 6/13/2021 | 6/14/2021         | 7/25/2021 | +6.8pp | [-4.2pp, +17.5pp]  |
| 5/24/2021       | 6/20/2021 | 6/21/2021         | 7/25/2021 | +6.3pp | [-6.2pp, + 18.6pp] |

187

188 **9. Placebo-in-time and Leave-one-out Robustness Checks**

189 We conducted two robustness checks. First, we conducted an in-time placebo test, in which we constructed a  
 190 synthetic control group using data through May 23, 2021 and compared vaccination outcomes through July 25,  
 191 2021.<sup>10</sup> No intervention occurred during this period, so vaccination rates should match through July 25, 2021 and  
 192 diverge thereafter. Figure A9.1 shows the results of the in-time placebo analysis. As expected, vaccination rates in  
 193 New York City closely tracked those of the in-time placebo synthetic control group through July 25 and deviated  
 194 thereafter.

195 **Figure A9.1: Daily COVID-19 vaccinations (first dose) for adults 18 or older in NYC and the placebo-in-time**  
 196 **synthetic control group.** Data are from CDC.<sup>1</sup> The vertical dashed line indicates the placebo intervention date; the  
 197 synthetic control group was constructed using vaccination data from before this date. The vertical solid line indicates  
 198 the start of the actual intervention period.

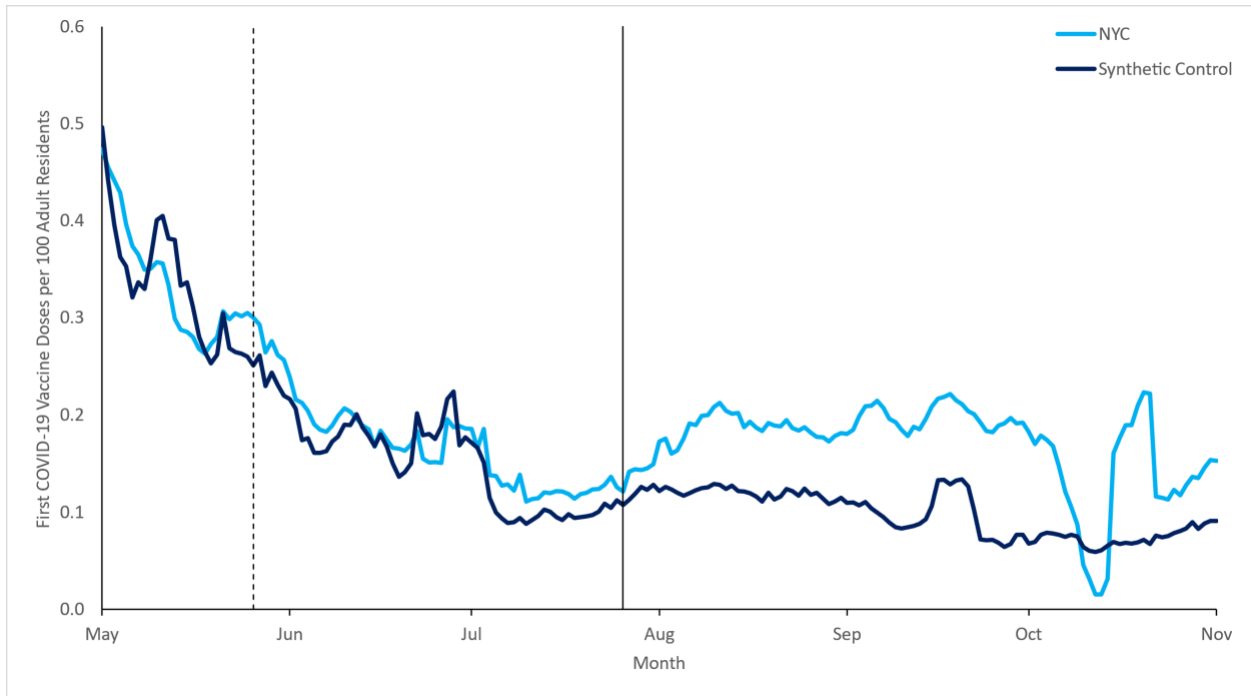

199  
 200 Second, we conducted a leave-one-out test, in which we iterated over the synthetic control group and reselected an  
 201 alternate synthetic control group corresponding to each control county from a constrained donor pool that omitted  
 202 that county.<sup>10</sup> Any inconsistencies between the main analysis and the leave-one-out tests could indicate that the  
 203 impact from the main analysis was driven by an idiosyncratic vaccination trend one of the control counties. Table  
 204 A9.1 shows the original synthetic control group alongside the three alternate control groups. Figure A9.2 shows the  
 205 results of the leave-one-out test. Results were broadly consistent for each of the three alternate synthetic control  
 206 groups.

207 **Table A9.1: Composition of the synthetic control groups selected for the leave-one-out test.** Weights may not  
 208 add to 100% due to rounding.

| County     | State         | Largest City | Weight in Synthetic Control Group |                  |                 |                  |
|------------|---------------|--------------|-----------------------------------|------------------|-----------------|------------------|
|            |               |              | Full Donor Pool                   | Omit Hudson (NJ) | Omit Wayne (MI) | Omit Shelby (TN) |
| Hudson     | New Jersey    | Jersey City  | 68.7%                             | N/A              | 63.5%           | 68.4%            |
| Wayne      | Michigan      | Detroit      | 23.9%                             | 0.0%             | N/A             | 31.2%            |
| Shelby     | Tennessee     | Memphis      | 7.4%                              | 0.0%             | 28.2%           | N/A              |
| Suffolk    | Massachusetts | Boston       | 0.0%                              | 60.8%            | 8.3%            | 0.0%             |
| Miami-Dade | Florida       | Miami        | 0.0%                              | 9.1%             | 0.0%            | 0.4%             |

209

210 **Figure A9.2: Daily COVID-19 vaccinations (first dose) for adults 18 or older in NYC and the leave-one-out**  
211 **test synthetic control groups.** Data are from CDC.<sup>1</sup> The validation period starts at the Y-axis. The vertical dashed

212 line indicates the start of the matching period. The vertical solid line indicates the start of the intervention period.

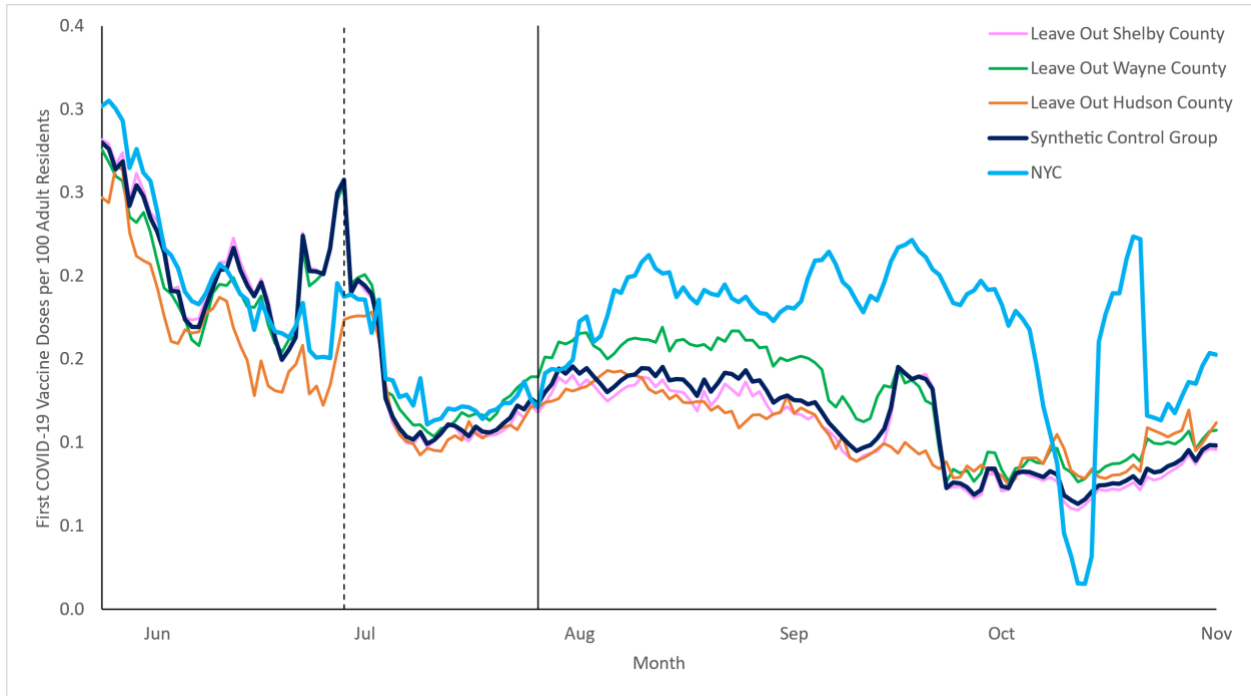

213

214

215 **10. Robustness to Exclusion of Counties with Vaccination Incentive Lotteries**

216 The donor pool for a synthetic control analysis typically excludes any units that have implemented policies similar  
 217 to those implemented in the treated unit(s). The analysis presented in the main text included 12 counties whose  
 218 residents were eligible for vaccination incentive lotteries (table A10.1). These lotteries could be considered  
 219 sufficiently comparable to NYC’s \$100 vaccination incentive to justify the exclusion of the 12 counties from the  
 220 control pool. NYC residents were likewise eligible for a state-run lottery, but there were only four participating sites  
 221 in the entire City. We retained the 12 lottery counties in the donor pool for the main analysis to preserve power for  
 222 statistical inference. Here, we test the robustness of the main analysis to the exclusion of these 12 counties from the  
 223 donor pool.

224 **Table A10.1 Donor pool counties with COVID-19 vaccination lotteries.**

| County                   | State         | Largest City | Metropolitan Statistical Area            | Implemented By | Announced | Last Eligibility Date |
|--------------------------|---------------|--------------|------------------------------------------|----------------|-----------|-----------------------|
| Pima <sup>12</sup>       | Arizona       | Tucson       | Tucson, AZ                               | County         | 6/4/2021  | 6/30/2021             |
| Pulaski <sup>12</sup>    | Arkansas      | Little Rock  | Little Rock-North Little Rock-Conway, AR | State          | 5/25/2021 | Unknown or N/A        |
| Fayette <sup>13</sup>    | Kentucky      | Lexington    | Lexington-Fayette, KY                    | State          | 6/4/2021  | 8/25/2021             |
| Jefferson <sup>13</sup>  | Kentucky      | Louisville   | Louisville/Jefferson County, KY-IN       | State          | 6/4/2021  | 8/25/2021             |
| Hampden <sup>14</sup>    | Massachusetts | Springfield  | Springfield, MA                          | State          | 6/15/2021 | 8/19/2021             |
| Suffolk <sup>14</sup>    | Massachusetts | Boston       | Boston-Cambridge-Newton, MA-NH           | State          | 6/15/2021 | 8/19/2021             |
| Worcester <sup>14</sup>  | Massachusetts | Worcester    | Worcester, MA-CT                         | State          | 6/15/2021 | 8/19/2021             |
| Wayne <sup>15</sup>      | Michigan      | Detroit      | Detroit-Warren-Dearborn, MI              | State          | 7/1/2021  | 8/3/2021              |
| Jackson <sup>16</sup>    | Missouri      | Kansas City  | Kansas City, MO-KS                       | State          | 7/21/2021 | 10/6/2021             |
| Clark <sup>17</sup>      | Nevada        | Las Vegas    | Las Vegas-Henderson-Paradise, NV         | State          | 6/17/2021 | 8/26/2021             |
| Franklin <sup>18</sup>   | Ohio          | Columbus     | Columbus, OH                             | State          | 5/13/2021 | 6/23/2021             |
| Montgomery <sup>18</sup> | Ohio          | Dayton       | Dayton-Kettering, OH                     | State          | 5/12/2021 | 6/23/2021             |

225 The synthetic control group for this analysis consisted of Hudson County, New Jersey (66·3%), Shelby County,  
 226 Tennessee (31·6%), and Sarasota County, Florida (2·0%) (table A10.2). Hudson County and Shelby County were  
 227 also included in the synthetic control group for the main analysis. Wayne County—the third county from that  
 228 synthetic control group—was not eligible for inclusion here since Michigan implemented a vaccination incentive  
 229 lottery.

230 **Table A10.2: Composition of the synthetic control group.**

| County   | State      | Largest City | Metropolitan Statistical Area         | Weight |
|----------|------------|--------------|---------------------------------------|--------|
| Hudson   | New Jersey | Jersey City  | New York-Newark-Jersey City, NY-NJ-PA | 66·3%  |
| Shelby   | Tennessee  | Memphis      | Memphis, TN-MS-AR                     | 31·6%  |
| Sarasota | Florida    | North Port   | North Port, Sarasota, Bradenton, FL   | 2·0%   |

231 NYC generally resembled this synthetic control group across characteristics used in the matching process (table  
 232 A10.3). NYC was slightly less Hispanic and non-Hispanic Black more non-Hispanic Asian, more Democratic, older,  
 233 and lower income than the control group used here, but the differences were small. Additionally, NYC had a slightly  
 234 lower recent vaccination rate as of July 25, 2021.

235 **Table A10.3: Characteristics of NYC and the synthetic control group.** Educational attainment is reported for  
 236 adults 25 years and over. Democratic vote share is calculated as the share of all non-third-party votes earned by the  
 237 Democratic candidate in the 2020 presidential election. Vaccination outcomes are calculated for adults.

|                          | NYC (SE)*  | Synthetic Control (SE) |
|--------------------------|------------|------------------------|
| <b>Race/Ethnicity, %</b> |            |                        |
| Hispanic                 | 29·1 (NA)† | 30·6 (NA)              |
| Non-Hispanic Asian       | 14·3 (0·1) | 11·1 (0·1)             |



|                                        | NYC (SE)*    | Synthetic Control (SE) |
|----------------------------------------|--------------|------------------------|
| Non-Hispanic Black                     | 21.7 (0.1)   | 23.9 (0.1)             |
| <b>Age group, %</b>                    |              |                        |
| 16-59                                  | 60.5 (0.1)   | 61.6 (0.2)             |
| ≥60                                    | 21.1 (0.1)   | 18.8 (0.2)             |
| <b>Sex, %</b>                          |              |                        |
| Male                                   | 47.7 (0.0)   | 49.0 (0.1)             |
| <b>Educational attainment, %</b>       |              |                        |
| High school graduate or higher         | 83.2 (0.2)   | 86.6 (0.4)             |
| Bachelor's degree or higher            | 39.2 (0.2)   | 40.7 (0.6)             |
| <b>Economic attributes</b>             |              |                        |
| Median household income (\$)‡          | 69,407 (681) | 70,203 (1,321)         |
| Poverty rate (%)                       | 16.0 (0.2)   | 14.7 (0.6)             |
| Unemployment rate (%)                  | 5.2 (0.1)    | 4.1 (0.3)              |
| <b>Metropolitan area population, %</b> |              |                        |
| ≥ 1 million                            | 100.0 (NA)§  | 98.0 (NA)              |
| 500,000-999,999                        | 0.0 (NA)     | 2.0 (NA)               |
| <b>Partisanship, %</b>                 |              |                        |
| Democratic vote share in 2020          | 77.0 (NA)    | 70.3 (NA)              |
| <b>Vaccination, %</b>                  |              |                        |
| At least one dose as of Jul 25         | 72.5 (NA)    | 72.6 (NA)              |
| Received first dose June 28-July 25    | 3.4 (NA)     | 3.5 (NA)               |

238 \*NYC's standard errors for most outcomes are calculated from the margins of error (90% confidence interval) reported by the Census Bureau.  
239 Standard errors for the synthetic control group and donor pool are estimated from means and margins of error reported for each county and do not  
240 account for covariance across counties. Standard errors for the share of residents between 16 and 59 are estimated from the point estimates and  
241 standard errors for the share of the population 16 or older and 60 or older.

242 †No standard errors are provided for the percent of the population that is Hispanic because the share is controlled to the official population  
243 estimate.

244 ‡Estimates for median household income are reported with a standard error rather than an IQR because the American Community Survey 1-year  
245 estimate data tables do not include the 25<sup>th</sup> and 75<sup>th</sup> percentile of household income for counties.

246 §Metropolitan area population, 2020 Democratic vote share, and vaccination outcomes are observed without sampling error. NA indicates that  
247 standard errors are not applicable for these attributes.

248 Figure A10.1 shows the seven-day average of the share of residents 18 or older who received a first dose of an  
249 authorized COVID-19 vaccine on each day in NYC and in the synthetic control group. Vaccination rates were  
250 broadly similar between May 24 and July 25. Vaccination rates in New York exceed those in the synthetic control  
251 group throughout most of the intervention period, as in the main analysis. The cumulative gap in the share of adult  
252 residents receiving at least one dose of an authorized COVID-19 vaccine is 289,627 persons or 4.4pp through  
253 November 1, 2021 (95% CI [-3.6pp, +12.2pp]). Though not statistically significant, the impact estimate is consistent  
254 in direction and comparable in magnitude to the impact estimate from the main analysis.

255 **Figure A10.1: Daily COVID-19 vaccination (first dose) for adults in NYC and a synthetic control group that**  
256 **excludes counties with vaccine lotteries.** Data are from CDC.<sup>1</sup> The validation period starts at the Y-axis. The  
257 vertical dashed line indicates the start of the matching period. The vertical solid line indicates the start of the

258 intervention period.

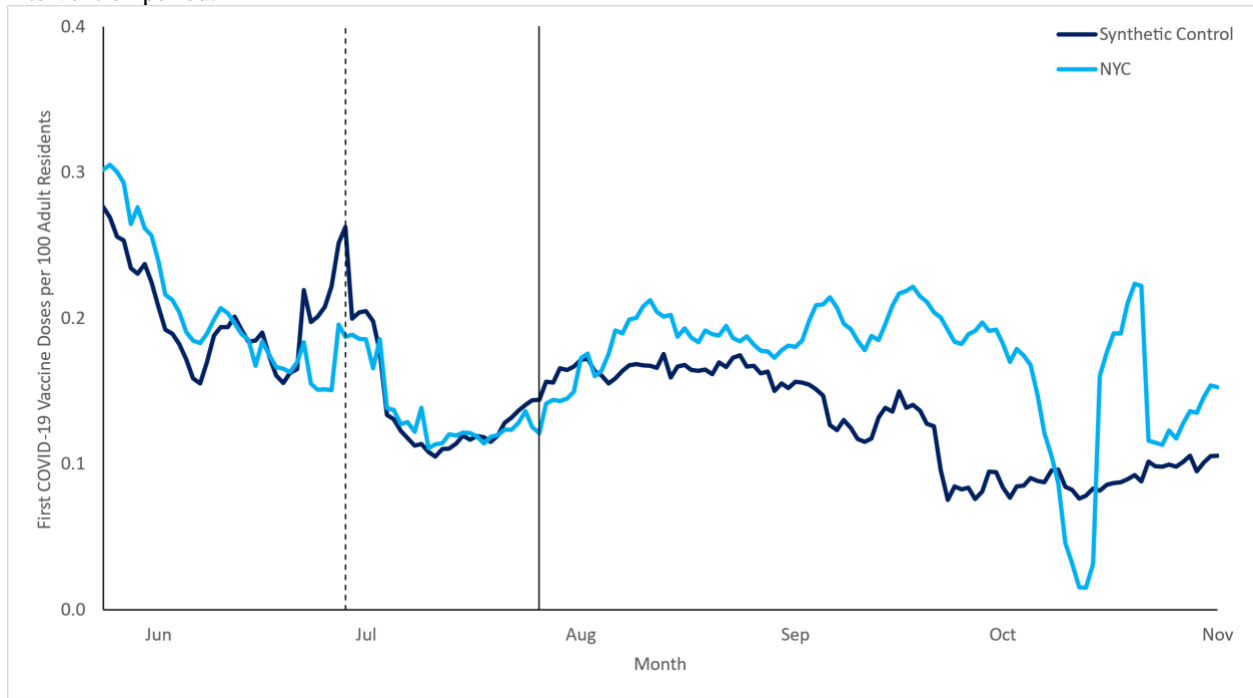

259

260

261 **11. Robustness to Exclusion of Counties with Reimbursement for Vaccine Counseling**

262 The donor pool for a synthetic control analysis typically excludes any units that have implemented policies similar  
 263 to those implemented in the treated unit(s). The analysis presented in the main text included three counties in  
 264 Massachusetts, which provided reimbursement to doctors for vaccine counseling conversations with participants in  
 265 Medicaid.<sup>19</sup> Massachusetts’ program could be considered comparable to NYC’s vaccine counseling reimbursement  
 266 program for primary care physicians for participants in some Medicaid and Medicare Advantage programs. We  
 267 retained the three vaccine counseling reimbursement counties in the donor pool for the main analysis out of concern  
 268 that vaccine counseling reimbursement programs might be less well publicized than the other programs analyzed  
 269 and thus we might not successfully identify all programs implemented in other counties. Here, we test the robustness  
 270 of the main analysis to the exclusion of these three counties from the donor pool.

271  
 272 The synthetic control group for this analysis consisted of Hudson County, New Jersey (67.5%), Wayne County,  
 273 Michigan (25.7%), Shelby County, Tennessee (6.7%), and Miami-Dade County, Florida (0.1%) (table A11.1).  
 274 Hudson, Wayne, and Shelby Counties were also included in the synthetic control group for the main analysis, with  
 275 similar weights.

276 **Table A11.1: Composition of the synthetic control group.**

| County     | State      | Largest City | Metropolitan Statistical Area           | Weight |
|------------|------------|--------------|-----------------------------------------|--------|
| Hudson     | New Jersey | Jersey City  | New York-Newark-Jersey City, NY-NJ-PA   | 67.5%  |
| Wayne      | Michigan   | Detroit      | Detroit-Warren-Dearborn, MI             | 25.7%  |
| Shelby     | Tennessee  | Memphis      | Memphis, TN-MS-AR                       | 6.7%   |
| Miami-Dade | Florida    | Miami        | Miami-Fort Lauderdale-Pompano Beach, FL | 0.1%   |

277 NYC generally resembled this synthetic control group across characteristics used in the matching process (table  
 278 A11.2). NYC was slightly less Hispanic, more non-Hispanic Asian and non-Hispanic Black, more Democratic, and  
 279 older than the control group used here, but the differences were small. Additionally, NYC had a slightly higher  
 280 recent vaccination rate but a slightly lower cumulative vaccination rate as of July 25, 2021.

281 **Table A11.2: Characteristics of NYC and the synthetic control group.** Educational attainment is reported for  
 282 adults 25 years and over. Democratic vote share is calculated as the share of all non-third-party votes earned by the  
 283 Democratic candidate in the 2020 presidential election. Vaccination outcomes are calculated for adults.

|                                  | NYC (SE)*    | Synthetic Control (SE) |
|----------------------------------|--------------|------------------------|
| <b>Race/Ethnicity, %</b>         |              |                        |
| Hispanic                         | 29.1 (NA)†   | 30.9 (NA)              |
| Non-Hispanic Asian               | 14.3 (0.1)   | 11.4 (0.1)             |
| Non-Hispanic Black               | 21.7 (0.1)   | 20.4 (0.1)             |
| <b>Age group, %</b>              |              |                        |
| 16-59                            | 60.5 (0.1)   | 61.8 (0.2)             |
| ≥60                              | 21.1 (0.1)   | 18.9 (0.2)             |
| <b>Sex, %</b>                    |              |                        |
| Male                             | 47.7 (0.0)   | 49.2 (0.1)             |
| <b>Educational attainment, %</b> |              |                        |
| High school graduate or higher   | 83.2 (0.2)   | 86.4 (0.4)             |
| Bachelor’s degree or higher      | 39.2 (0.2)   | 39.1 (0.5)             |
| <b>Economic attributes</b>       |              |                        |
| Median household income (\$)‡    | 69,407 (681) | 69,819 (1,263)         |
| Poverty rate (%)                 | 16.0 (0.2)   | 15.6 (0.5)             |
| Unemployment rate (%)            | 5.2 (0.1)    | 4.2 (0.2)              |

|                                        | NYC (SE)*   | Synthetic Control (SE) |
|----------------------------------------|-------------|------------------------|
| <b>Metropolitan area population, %</b> |             |                        |
| ≥ 1 million                            | 100·0 (NA)§ | 100·0 (NA)             |
| 500,000-999,999                        | 0·0 (NA)    | 0·0 (NA)               |
| <b>Partisanship, %</b>                 |             |                        |
| Democratic vote share in 2020          | 77·0 (NA)   | 71·8 (NA)              |
| <b>Vaccination, %</b>                  |             |                        |
| At least one dose as of July 25        | 72·5 (NA)   | 73·0 (NA)              |
| Received first dose June 28-July 25    | 3·4 (NA)    | 3·2 (NA)               |

284 \*NYC's standard errors for most outcomes are calculated from the margins of error (90% confidence interval) reported by the Census Bureau.  
285 Standard errors for the synthetic control group and donor pool are estimated from means and margins of error reported for each county and do not  
286 account for covariance across counties. Standard errors for the share of residents between 16 and 59 are estimated from the point estimates and  
287 standard errors for the share of the population 16 or older and 60 or older.

288 †No standard errors are provided for the percent of the population that is Hispanic because the share is controlled to the official population  
289 estimate.

290 ‡Estimates for median household income are reported with a standard error rather than an IQR because the American Community Survey 1-year  
291 estimate data tables do not include the 25<sup>th</sup> and 75<sup>th</sup> percentile of household income for counties.

292 §Metropolitan area population, 2020 Democratic vote share, and vaccination outcomes are observed without sampling error. NA indicates that  
293 standard errors are not applicable for these attributes.

294 Figure A11.1 shows the seven-day average of the share of residents 18 or older who received a first dose of an  
295 authorized COVID-19 vaccine on each day in NYC and in the synthetic control group. Vaccination rates are broadly  
296 similar between May 24 and July 25. Vaccination rates in New York exceed those in the synthetic control group  
297 throughout most of the intervention period, as in the main analysis. The cumulative gap in the share of adult  
298 residents receiving at least one dose of an authorized COVID-19 vaccine is 418,648 persons or 6·3pp through  
299 November 1, 2021 (95% CI [+1·3pp, +11·0pp]). The impact estimate is consistent in direction and comparable in  
300 magnitude to the impact estimate from the main analysis.

301 **Figure A11.1: Daily COVID-19 vaccination (first dose) for adults in NYC and a synthetic control group that**  
302 **excludes counties with reimbursement for vaccine counseling.** Data are from CDC.<sup>1</sup> The validation period starts  
303 at the Y-axis. The vertical dashed line indicates the start of the matching period. The vertical solid line indicates the  
304 start of the intervention period.

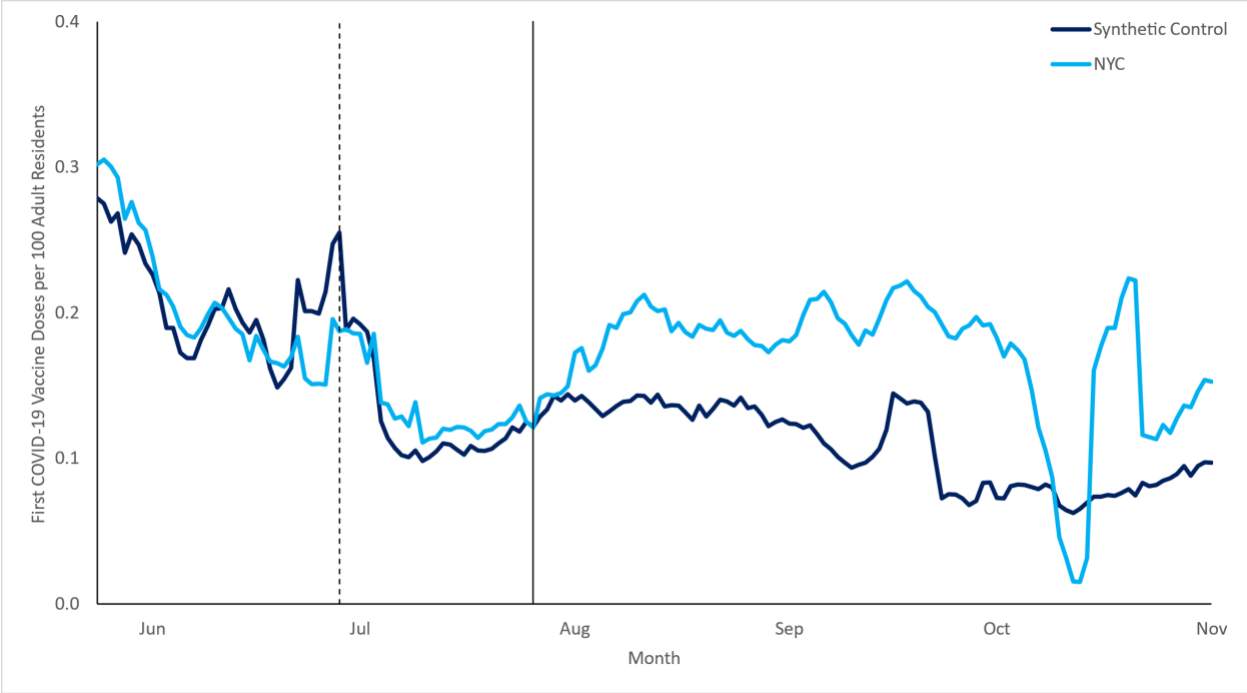

305

306 **12. Impact on Receipt of First Doses for Residents 65 or Older**

307 Results presented in the main text show that the policies implemented in NYC had little or no impact on the receipt  
 308 of first doses by residents 65 or older. We present that analysis here in greater detail.

309 We selected a separate synthetic control group for this analysis using a similar specification to the main analysis. We  
 310 matched on age-specific covariates where available and population-wide covariates otherwise.

311 The synthetic control group used for this analysis consisted of Hudson County, New Jersey (62.2%), Shelby County,  
 312 Tennessee (17.4%), Suffolk County, Massachusetts (13.8%), and Union County, New Jersey (6.6%) (table A12.1).  
 313 Hudson County and Shelby County were also part of the main analysis synthetic control group.

314 **Table A12.1: Composition of the synthetic control group.**

| County  | State         | Largest City | Metropolitan Statistical Area         | Weight |
|---------|---------------|--------------|---------------------------------------|--------|
| Hudson  | New Jersey    | Jersey City  | New York-Newark-Jersey City, NY-NJ-PA | 62.2%  |
| Shelby  | Tennessee     | Memphis      | Memphis, TN-MS-AR                     | 17.4%  |
| Suffolk | Massachusetts | Boston       | Boston-Cambridge-Newton, MA           | 13.8%  |
| Union   | New Jersey    | Elizabeth    | New York-Newark-Jersey City, NY-NJ-PA | 6.6%   |

315 New York City generally resembled the synthetic control group for this analysis across characteristics used in the  
 316 matching process (table A12.2). NYC was slightly less Hispanic, more non-Hispanic Asian and non-Hispanic Black,  
 317 more Democratic, and higher income than the control group used here, but the differences were small. Additionally,  
 318 NYC had a slightly higher recent vaccination rate but a slightly lower cumulative vaccination rate as of July 25,  
 319 2021.

320 **Table A12.2: Characteristics of NYC and the synthetic control group.** Sex, educational attainment, economic  
 321 attributes, and vaccination rates are reported for adults 65 years and over. Race/ethnicity, metropolitan area  
 322 population, and partisanship are calculated for all ages. Democratic vote share is calculated as the share of all non-  
 323 third-party votes earned by the Democratic candidate in the 2020 presidential election.

|                                        | NYC (SE)*    | Synthetic Control (SE) |
|----------------------------------------|--------------|------------------------|
| <b>Race/Ethnicity, %</b>               |              |                        |
| Hispanic                               | 29.1 (NA)†   | 33.1 (NA)              |
| Non-Hispanic Asian                     | 14.3 (0.1)   | 11.6 (0.1)             |
| Non-Hispanic Black                     | 21.7 (0.1)   | 19.8 (0.1)             |
| <b>Sex, %</b>                          |              |                        |
| Male                                   | 41.3 (0.4)   | 41.9 (1.0)             |
| <b>Educational attainment, %</b>       |              |                        |
| High school graduate or higher         | 72.3 (0.4)   | 72.1 (1.0)             |
| Bachelor's degree or higher            | 28.6 (0.4)   | 24.7 (0.9)             |
| <b>Economic attributes</b>             |              |                        |
| Median household income (\$)‡          | 41,054 (781) | 37,919 (1,222)         |
| Poverty rate (%)                       | 18.4 (0.4)   | 18.1 (1.2)             |
| Unemployment rate (%)                  | 3.4 (0.4)    | 2.1 (0.7)              |
| <b>Metropolitan area population, %</b> |              |                        |
| ≥ 1 million                            | 100.0 (NA)§  | 100.0 (NA)             |
| 500,000-999,999                        | 0.0 (NA)     | 0.0 (NA)               |
| <b>Partisanship, %</b>                 |              |                        |
| Democratic vote share in 2020          | 77.0 (NA)    | 72.9 (NA)              |
| <b>Vaccination, %</b>                  |              |                        |

|  | NYC (SE)* | Synthetic Control (SE) |
|--|-----------|------------------------|
|--|-----------|------------------------|

|                                 |           |           |
|---------------------------------|-----------|-----------|
| At least one dose as of July 25 | 79.0 (NA) | 81.9 (NA) |
|---------------------------------|-----------|-----------|

|                                     |          |          |
|-------------------------------------|----------|----------|
| Received first dose June 28-July 25 | 2.1 (NA) | 1.9 (NA) |
|-------------------------------------|----------|----------|

324 \*NYC's standard errors for most outcomes are calculated from the margins of error (90% confidence interval) reported by the Census Bureau.  
 325 Standard errors for the synthetic control group and donor pool are estimated from means and margins of error reported for each county and do not  
 326 account for covariance across counties. Standard errors for sex and unemployment rate are estimated from the point estimates and standard errors  
 327 from other reported outcomes.

328 †No standard errors are provided for the percent of the population that is Hispanic because the share is controlled to the official population  
 329 estimate.

330 ‡Estimates for median household income are reported with a standard error rather than an IQR because the American Community Survey 1-year  
 331 estimate data tables do not include the 25<sup>th</sup> and 75<sup>th</sup> percentile of household income for counties.

332 §Metropolitan area population, 2020 Democratic vote share, and vaccination outcomes are observed without sampling error. NA indicates that  
 333 standard errors are not applicable for these attributes.

334 Figure A12.1 (included in the main text as figure 7) shows the seven-day average of the share of residents 65 or  
 335 older who received a first dose of an authorized COVID-19 vaccine on each date in NYC and in the synthetic  
 336 control group. Vaccination rates were slightly higher in NYC than in the synthetic control group between May 24  
 337 and July 25, indicating a good but imperfect fit. Vaccination rates in New York tracked those in the synthetic control  
 338 group closely after July 25, 2021, indicating no impact. The apparent divergences in late September and early-to-  
 339 mid October reflect reporting issues and do not indicate true differences in vaccination rates between the two  
 340 groups. The cumulative gap in vaccinations between NYC and the synthetic control group through November 1,  
 341 2021 is 0.3 percentage points (95% CI [-11.4pp, +12.3pp]), or 3,967 additional persons vaccinated.

342 **Figure A12.1: Daily COVID-19 vaccinations (first dose) for adults 65 or older in NYC and the synthetic**  
 343 **control group.** Data are from CDC.<sup>1</sup> The validation period starts at the Y-axis. The vertical dashed line indicates the  
 344 start of the matching period. The vertical solid line indicates the start of the intervention period.

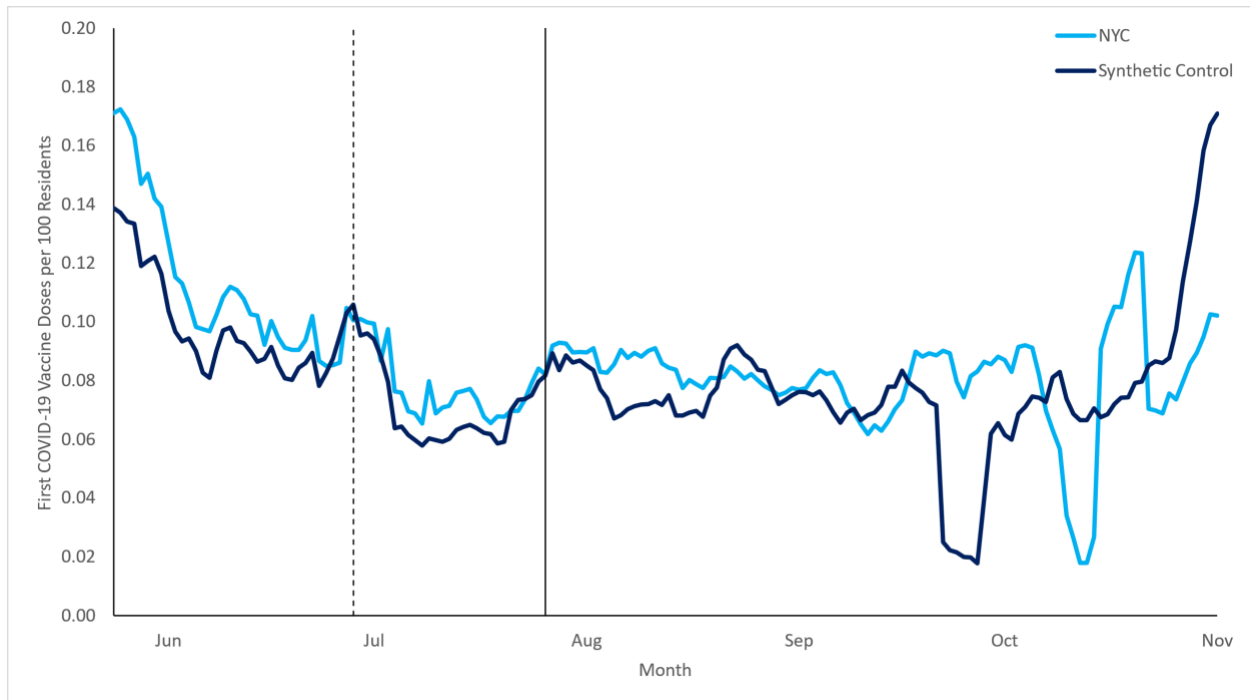

345

346

347

348 **13. Impact on Completion of Vaccination Series for Residents 18 or Older**

349 Results presented in the main text show that the policies implemented in NYC increased completion of vaccination  
 350 series after a lag. We present that analysis here in greater detail.

351 We selected a separate synthetic control group for this analysis using a similar specification to the main analysis,  
 352 matching on completion of COVID-19 vaccination series rather than on receipt of the first dose of an authorized  
 353 COVID-19 vaccine.

354 The synthetic control group used for this analysis consisted of Suffolk County, Massachusetts (34.1%), Hudson  
 355 County, New Jersey (26.1%), Miami-Dade County, Florida (19.3%), Wayne County, Michigan (13.3%), and Shelby  
 356 County, Tennessee (7.2%) (table A13.1). All three counties included in the synthetic control group for the main  
 357 analysis were included here as well.

358 **Table A13.1: Composition of the synthetic control group.**

| County     | State         | Largest City | Metropolitan Statistical Area           | Weight |
|------------|---------------|--------------|-----------------------------------------|--------|
| Suffolk    | Massachusetts | Boston       | Boston-Cambridge-Newton, MA             | 34.1%  |
| Hudson     | New Jersey    | Jersey City  | New York-Newark-Jersey City, NY-NJ-PA   | 26.1%  |
| Miami-Dade | Florida       | Miami        | Miami-Fort Lauderdale-Pompano Beach, FL | 19.3%  |
| Wayne      | Michigan      | Detroit      | Detroit, Warren, Dearborn, MI           | 13.3%  |
| Shelby     | Tennessee     | Memphis      | Memphis, TN-MS-AR                       | 7.2%   |

359 NYC generally resembled this synthetic control group across characteristics used in the matching process (table  
 360 A13.2). NYC was slightly less Hispanic, substantially more non-Hispanic Asian, more Democratic, and lower  
 361 income than the control group used here, but most differences were small. Additionally, NYC had a slightly higher  
 362 recent vaccination rate but a slightly lower cumulative vaccination rate as of July 25, 2021.

363 **Table A13.2: Characteristics of NYC and the synthetic control group.** Educational attainment is reported for  
 364 adults 25 years and over. Democratic vote share is calculated as the share of all non-third-party votes earned by the  
 365 Democratic candidate in the 2020 presidential election. Vaccination outcomes are calculated for adults.

|                                        | NYC (SE)*    | Synthetic Control (SE) |
|----------------------------------------|--------------|------------------------|
| <b>Race/Ethnicity, %</b>               |              |                        |
| Hispanic                               | 29.1 (NA)†   | 33.8 (NA)              |
| Non-Hispanic Asian                     | 14.3 (0.1)   | 8.0 (0.1)              |
| Non-Hispanic Black                     | 21.7 (0.1)   | 21.3 (0.1)             |
| <b>Age group, %</b>                    |              |                        |
| 16-59                                  | 60.5 (0.1)   | 63.2 (0.1)             |
| ≥60                                    | 21.1 (0.1)   | 19.2 (0.1)             |
| <b>Sex, %</b>                          |              |                        |
| Male                                   | 47.7 (0.0)   | 48.6 (0.1)             |
| <b>Educational attainment, %</b>       |              |                        |
| High school graduate or higher         | 83.2 (0.2)   | 85.9 (0.3)             |
| Bachelor's degree or higher            | 39.2 (0.2)   | 39.7 (0.3)             |
| <b>Economic attributes</b>             |              |                        |
| Median household income (\$)‡          | 69,407 (681) | 68,203 (974)           |
| Poverty rate (%)                       | 16.0 (0.2)   | 16.2 (0.3)             |
| Unemployment rate (%)                  | 5.2 (0.1)    | 4.3 (0.2)              |
| <b>Metropolitan area population, %</b> |              |                        |
| ≥ 1 million                            | 100.0 (NA)§  | 100.0 (NA)             |



|                                         | NYC (SE)* | Synthetic Control (SE) |
|-----------------------------------------|-----------|------------------------|
| 500,000-999,999                         | 0·0 (NA)  | 0·0 (NA)               |
| <b>Partisanship, %</b>                  |           |                        |
| Democratic vote share in 2020           | 77·0 (NA) | 71·5 (NA)              |
| <b>Vaccination, %</b>                   |           |                        |
| Fully vaccinated as of July 25          | 65·0 (NA) | 65·2 (NA)              |
| Became fully vaccinated June 28-July 25 | 3·6 (NA)  | 3·4 (NA)               |

366 \*NYC's standard errors for most outcomes are calculated from the margins of error (90% confidence interval) reported by the Census Bureau.  
367 Standard errors for the synthetic control group and donor pool are estimated from means and margins of error reported for each county and do not  
368 account for covariance across counties. Standard errors for the share of residents between 16 and 59 are estimated from the point estimates and  
369 standard errors for the share of the population 16 or older and 60 or older.

370 †No standard errors are provided for the percent of the population that is Hispanic because the share is controlled to the official population  
371 estimate.

372 ‡Estimates for median household income are reported with a standard error rather than an IQR because the American Community Survey 1-year  
373 estimate data tables do not include the 25<sup>th</sup> and 75<sup>th</sup> percentile of household income for counties.

374 §Metropolitan area population, 2020 Democratic vote share, and vaccination outcomes are observed without sampling error. NA indicates that  
375 standard errors are not applicable for these attributes.

376 Figure A13.1 (included in the main text as figure 8) shows the seven-day average of the share of residents 18 or  
377 older becoming fully vaccinated on each date in NYC and in the synthetic control group. Vaccination rates are  
378 broadly similar between May 24 and July 25. Vaccination rates in New York exceed those in the synthetic control  
379 group slightly in the first five weeks after July 26, 2021 and more so thereafter. A lagged impact of three-to-four  
380 weeks was expected since the earliest policies implemented on or after July 26, 2021 targeted receipt of first doses  
381 only. The cumulative gap in vaccination series completions between NYC and the synthetic control group through  
382 November 1, 2021 is 270,401 persons or 4·1pp (95% CI [-2·9 pp, +10·8pp]), compared to an impact of 6·2pp in the  
383 main analysis. A smaller impact was expected because of attrition between the first and second dose and because no  
384 impact was expected during the first three-to-four weeks.

385 **Figure A13.1: Daily COVID-19 vaccination series completions for adults in NYC and the synthetic control**  
386 **group.** Data are from CDC.<sup>1</sup> The validation period starts at the Y-axis. The vertical dashed line indicates the start of  
387 the matching period. The vertical solid line indicates the start of the intervention period. The vertical dotted line  
388 indicates the first date on which someone who received the first dose of a two-dose series at the start of the  
389 intervention period could have become eligible for a second dose.

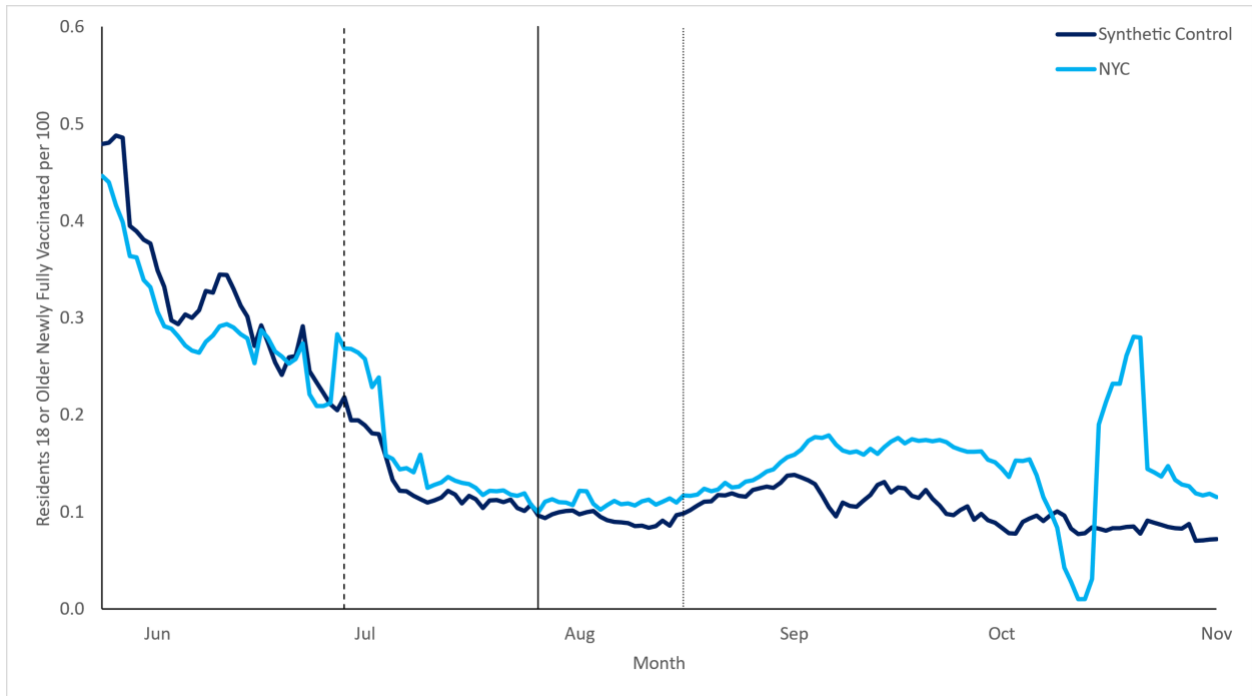

390

391

392 **References**

- 393 1 US Centers for Disease Control and Prevention. COVID-19 vaccinations in the United States, county.  
394 <https://data.cdc.gov/Vaccinations/COVID-19-Vaccinations-in-the-United-States-County/8xkx-amqh> (accessed  
395 February 11, 2022).
- 396 2 US Centers for Disease Control and Prevention. Archive of COVID-19 vaccination data updates.  
397 <https://www.cdc.gov/coronavirus/2019-ncov/vaccines/distributing/vaccination-data-archived-updates.html> (accessed  
398 March 3, 2022).
- 399 3 US Centers for Disease Control and Prevention. NCHS urban-rural classification scheme for counties.  
400 [https://www.cdc.gov/nchs/data\\_access/urban\\_rural.htm](https://www.cdc.gov/nchs/data_access/urban_rural.htm) (accessed February 14, 2022).
- 401 4 US Office of Management and Budget, Executive Office of the President. Revised delineations of  
402 metropolitan statistical areas, micropolitan statistical areas, and combined statistical areas, and guidance on uses of  
403 the delineations of these areas. Washington, DC: OMB; 2015 July. OMB Bulletin 15-01.
- 404 5 US Census Bureau. American community survey data tables. [https://www.census.gov/programs-](https://www.census.gov/programs-surveys/acs/data/data-tables.html)  
405 [surveys/acs/data/data-tables.html](https://www.census.gov/programs-surveys/acs/data/data-tables.html) (accessed February 14, 2022).
- 406 6 Aw J, Seng BJJ, Seah SSY, Low LL. COVID-19 vaccine hesitancy-a scoping review of literature in high-  
407 income countries. *Vaccines* 2021; **9**(8): 900.
- 408 7 US Department of Health and Human Services. COVID-19 community profile report.  
409 <https://healthdata.gov/Health/COVID-19-Community-Profile-Report/gqxm-d9w9> (accessed February 14, 2022).
- 410 8 US Department of Health and Human Services. COVID-19 community profile report.  
411 <https://healthdata.gov/Health/COVID-19-Community-Profile-Report/gqxm-d9w9> (accessed February 14, 2022).
- 412 9 Abadie A, Diamond A, Hainmueller, J. Synthetic control methods for comparative case studies: estimating  
413 the effect of California’s tobacco control program. *J Am Stat Assoc* 2010; **105**: 493–505.
- 414 10 Abadie A, Diamond A, Hainmueller J. Comparative politics and the synthetic control method. *Am J Pol Sci*  
415 2015; **59** 495–510.
- 416 11 Pima County. Health Department to offer Arizona Lottery scratcher tickets through June to boost  
417 vaccinations. <https://webcms.pima.gov/cms/One.aspx?portalId=169&pageId=759213> (accessed April 7, 2022).
- 418 12 Arkansas Democrat-Gazette. State to start offering lottery tickets, gift certificates for vaccinated.  
419 <https://www.arkansasonline.com/news/2021/may/25/watch-live-governor-give-130-pm-media-briefing/> (accessed  
420 April 7, 2022).
- 421 13 Staley C or Kitchen S. Gov. Beshear launches ‘Shot at a Million’ vaccine incentive drawing.  
422 <https://kentucky.gov/Pages/Activity-stream.aspx?n=GovernorBeshear&prId=810> (accessed April 7, 2022).
- 423 14 Massachusetts State Lottery. Massachusetts VaxMillions giveaway. [https://www.mass.gov/info-](https://www.mass.gov/info-details/massachusetts-vaxmillions-giveaway)  
424 [details/massachusetts-vaxmillions-giveaway](https://www.mass.gov/info-details/massachusetts-vaxmillions-giveaway) (accessed April 7, 2022).
- 425 15 MISHotToWinSweepstakes. Frequently asked questions.  
426 [https://www.mishottowin.com/index\\_files/MISHotToWin-FAQs.pdf](https://www.mishottowin.com/index_files/MISHotToWin-FAQs.pdf) (accessed April 7, 2022).
- 427 16 Missouri Department of Health & Senior Services. Winners of final MO VIP drawing announced.  
428 [https://health.mo.gov/news/newsitem/uuid/b06de44c-1ad0-460a-9195-e89c83c970ac/winners-of-final-mo-vip-](https://health.mo.gov/news/newsitem/uuid/b06de44c-1ad0-460a-9195-e89c83c970ac/winners-of-final-mo-vip-drawing-announced)  
429 [drawing-announced](https://health.mo.gov/news/newsitem/uuid/b06de44c-1ad0-460a-9195-e89c83c970ac/winners-of-final-mo-vip-drawing-announced) (accessed April 7, 2022).

430 17 State of Nevada announces Vax Nevada Days with \$5 million in prizes.  
431 [https://gov.nv.gov/News/Press/2021/State\\_of\\_Nevada\\_Announces\\_Vax\\_Nevada\\_Days\\_with\\_\\$5\\_Million\\_in\\_Prizes/](https://gov.nv.gov/News/Press/2021/State_of_Nevada_Announces_Vax_Nevada_Days_with_$5_Million_in_Prizes/)  
432 (accessed April 7, 2022).

433 18 Ohio Department of Health. Ohio Vax-a-Million details announced. [https://odh.ohio.gov/media-center/odh-](https://odh.ohio.gov/media-center/odh-news-releases/odh-news-release-05-17-21)  
434 [news-releases/odh-news-release-05-17-21](https://odh.ohio.gov/media-center/odh-news-releases/odh-news-release-05-17-21) (accessed April 7, 2022).

435

436 19 Kraft AC. Coverage and reimbursement policy for services related to coronavirus disease 2019 (COVID-  
437 19) vaccine counseling. Boston, MA: MassHealth; 2021 July. All provider bulletin 321.  
438 [https://www.mass.gov/doc/all-provider-bulletin-321-coverage-and-reimbursement-policy-for-services-related-to-](https://www.mass.gov/doc/all-provider-bulletin-321-coverage-and-reimbursement-policy-for-services-related-to-coronavirus-disease-2019-covid-19-vaccine-counseling-0/download)  
439 [coronavirus-disease-2019-covid-19-vaccine-counseling-0/download](https://www.mass.gov/doc/all-provider-bulletin-321-coverage-and-reimbursement-policy-for-services-related-to-coronavirus-disease-2019-covid-19-vaccine-counseling-0/download) (accessed April 14, 2022).
